# Supplementary material for: Estimation of bonding nature using diamagnetic susceptibility
Source: Royal Society of Chemistry journal article supplement (doi:10.1039/c5cc02351c), 2015-01-01
Supplement: c5cc02351c1.pdf [file c5cc02351c1.pdf]

# Estimation of Bonding Nature Using Diamagnetic Susceptibility: Supplementary Information

Keisuke Tomiyasu,<sup>\*a</sup> Toyoto Sato,<sup>b</sup> and Shin-ichi Orimo<sup>b,c</sup>

The numerical data used for generating the plot of  $\Delta\chi_{\text{EN}}$  versus  $\alpha$  [Fig. 1] is given in Table 1. Non-magnetic insulating materials, which are appropriate for LDS measurements, are selected because the LDS is too small to be extracted in materials with magnetic atoms or ions. The extraction of the LDS in metals, too, is difficult because metals exhibit Pauli paramagnetism and Landau diamagnetism in addition to Larmor diamagnetism.

**Table 1** Experimental ( $\chi_{\text{LD}}$ ) and theoretical ( $\chi_{\text{ref}}$ ) Larmor diamagnetic susceptibilities, their difference ( $\Delta\chi_{\text{LD}}$ ), summation of theoretical susceptibilities for atoms constituting dominant bonds ( $\sum_i \chi_{\text{ref}}(i)$ ), the deviation rate ( $\alpha$ ), and the electronegativity difference ( $\Delta\chi_{\text{EN}}$ ). For example, in the case of KCl,  $\Delta\chi_{\text{LD}} = (-39.3) - (-45.7) = 6.4$  and  $\alpha = -|6.4/(-45.7)| = 0.14$ . All the susceptibilities are in units of  $\text{emu mol}^{-1}$ . For simple substances, e.g., C (diamond), Si, Ge, and  $\text{H}_2$ , the referential values are set to those for the virtual ionic states, e.g.,  $\chi_{\text{ref}} = \{\chi_{\text{ref}}(\text{C}^{4+}) + \chi_{\text{ref}}(\text{C}^{4-})\}/2$  and  $\{\chi_{\text{ref}}(\text{H}^+) + \chi_{\text{ref}}(\text{H}^-)\}/2$ . Superscript [a] means data measured in this study.

| materials | $\chi_{\text{LD}}$ | $\chi_{\text{ref}}$ | $\Delta\chi_{\text{LD}}$ | $\sum_i \chi_{\text{ref}}(i)$ | $\alpha$ | $\Delta\chi_{\text{EN}}$ |
|-----------|--------------------|---------------------|--------------------------|-------------------------------|----------|--------------------------|
| LiF       | -10.1              | -8.4                | -1.7                     | -8.4                          | -0.21    | 3.00                     |
| LiCl      | -24.3              | -29.3               | 5.0                      | -29.3                         | 0.17     | 2.18                     |
| LiBr      | -34.3              | -54.3               | 20.0                     | -54.3                         | 0.37     | 1.98                     |
| LiI       | -50.0              | -80.3               | 30.3                     | -80.3                         | 0.38     | 1.68                     |
| NaF       | -16.4              | -12.3               | -4.1                     | -12.3                         | -0.33    | 3.05                     |
| NaCl      | -30.3              | -33.2               | 2.9                      | -33.2                         | 0.09     | 2.23                     |
| NaBr      | -41.0              | -58.2               | 17.2                     | -58.2                         | 0.30     | 2.03                     |
| NaI       | -57.0              | -84.2               | 27.2                     | -84.2                         | 0.32     | 1.73                     |
| KF        | -23.6              | -24.8               | 1.2                      | -24.8                         | 0.05     | 3.16                     |
| KCl       | -39.3              | -45.7               | 6.4                      | -45.7                         | 0.14     | 2.34                     |
| KBr       | -49.1              | -70.7               | 21.6                     | -70.7                         | 0.31     | 2.14                     |
| KI        | -63.8              | -96.7               | 32.9                     | -96.7                         | 0.34     | 1.84                     |
| RbF       | -31.9              | -43.1               | 11.2                     | -43.1                         | 0.26     | 3.16                     |
| RbBr      | -56.4              | -89.0               | 32.6                     | -89.0                         | 0.37     | 2.14                     |
| RbI       | -72.2              | -115.0              | 42.8                     | -115.0                        | 0.37     | 1.84                     |

<sup>a</sup> Department of Physics, Tohoku University, Aoba, Sendai 980-8578, Japan.  
E-mail: tomiyasu@m.tohoku.ac.jp

<sup>b</sup> Institute for Materials Research, Tohoku University, Aoba, Sendai 980-8577, Japan.

<sup>c</sup> WPI-Advanced Institute for Materials Research (WPI-AIMR), Tohoku University, Aoba, Sendai 980-8577, Japan.

|                                |        |        |       |        |       |      |
|--------------------------------|--------|--------|-------|--------|-------|------|
| CsF                            | -44.5  | -63.1  | 18.6  | -63.1  | 0.29  | 3.19 |
| CsCl                           | -56.7  | -84.0  | 27.3  | -84.0  | 0.32  | 2.37 |
| CsBr                           | -67.2  | -109.0 | 41.8  | -109.0 | 0.38  | 2.17 |
| CsI                            | -82.6  | -135.0 | 52.4  | -135.0 | 0.39  | 1.87 |
| BeO                            | -11.9  | -12.9  | 1.0   | -12.9  | 0.08  | 1.87 |
| MgO                            | -10.2  | -15.8  | 5.6   | -15.8  | 0.35  | 2.13 |
| CaS                            | -45.5  | -53.3  | 7.8   | -53.3  | 0.15  | 1.58 |
| CaSe                           | -61.2  | -83.3  | 22.2  | -83.3  | 0.27  | 1.55 |
| CaTe                           | -84.4  | -118.3 | 33.9  | -118.3 | 0.29  | 1.10 |
| SrS                            | -58.0  | -68.0  | 10.0  | -68.0  | 0.15  | 1.63 |
| SrSe                           | -75.5  | -98.0  | 22.5  | -98.0  | 0.23  | 1.60 |
| SrTe                           | -93.0  | -133.0 | 40.0  | -133.0 | 0.30  | 1.15 |
| BaS                            | -75.8  | -86.0  | 10.2  | -86.0  | 0.12  | 1.69 |
| Al <sub>2</sub> O <sub>3</sub> | -37.0  | -42.8  | 5.8   | -42.8  | 0.14  | 1.83 |
| In <sub>2</sub> O <sub>3</sub> | -56.0  | -101.8 | 45.8  | -101.8 | 0.45  | 1.66 |
| ZnS                            | -25.0  | -51.0  | 26.0  | -51.0  | 0.51  | 0.93 |
| CdS                            | -50.0  | -77.0  | 27.0  | -77.0  | 0.35  | 0.89 |
| AgBr                           | -61.0  | -98.0  | 37.0  | -98.0  | 0.38  | 1.03 |
| AgCl                           | -49.0  | -73.0  | 24.0  | -73.0  | 0.33  | 1.23 |
| AgF                            | -36.5  | -52.1  | 15.6  | -52.1  | 0.30  | 2.05 |
| AgI                            | -80.0  | -124.0 | 44.0  | -124.0 | 0.35  | 0.73 |
| GaP                            | -30.0  | -74.5  | 44.5  | -74.5  | 0.60  | 0.38 |
| GaAs                           | -33.3  | -104.5 | 71.2  | -104.5 | 0.68  | 0.37 |
| GaSb                           | -38.4  | -139.5 | 101.1 | -139.5 | 0.72  | 0.24 |
| InP                            | -45.6  | -97.0  | 51.4  | -97.0  | 0.53  | 0.41 |
| InAs                           | -55.3  | -127.0 | 71.7  | -127.0 | 0.56  | 0.40 |
| InSb                           | -65.9  | -162.0 | 96.1  | -162.0 | 0.59  | 0.27 |
| ZnSe                           | -46.5  | -81.0  | 34.5  | -81.0  | 0.43  | 0.90 |
| ZnTe                           | -67.0  | -118.0 | 51.0  | -118.0 | 0.43  | 0.45 |
| CdSe                           | -63.9  | -107.0 | 43.1  | -107.0 | 0.40  | 0.86 |
| CdTe                           | -84.0  | -142.0 | 58.0  | -142.0 | 0.41  | 0.41 |
| HgSe                           | -58.7  | -125.0 | 66.3  | -125.0 | 0.53  | 0.55 |
| HgTe                           | -75.8  | -160.0 | 84.2  | -160.0 | 0.53  | 0.10 |
| C (diamond)                    | -5.9   | -25.1  | 19.2  | -25.1  | 0.76  | 0    |
| Si                             | -3.1   | -56.0  | 52.9  | -56.0  | 0.94  | 0    |
| Ge                             | -11.6  | -76.2  | 64.7  | -76.2  | 0.85  | 0    |
| BCl <sub>3</sub>               | -59.9  | -87.2  | 27.3  | -87.2  | 0.31  | 1.12 |
| CO <sub>2</sub>                | -21.0  | -25.4  | 4.4   | -25.4  | 0.17  | 0.89 |
| CCL <sub>4</sub>               | -66.8  | -116.2 | 49.3  | -116.2 | 0.42  | 0.61 |
| CBr <sub>4</sub>               | -93.7  | -216.1 | 122.4 | -216.1 | 0.57  | 0.41 |
| Cl <sub>4</sub>                | -136.0 | -310.1 | 174.1 | -310.1 | 0.56  | 0.11 |
| GaCl <sub>3</sub>              | -63.0  | -96.5  | 33.5  | -96.5  | 0.35  | 1.35 |
| GeCl <sub>4</sub>              | -72.0  | -124.5 | 52.5  | -124.5 | 0.42  | 1.15 |
| GeF <sub>4</sub>               | -50.0  | -40.9  | -9.1  | -40.9  | -0.22 | 1.97 |

---

|                               |                          |        |          |        |           |      |
|-------------------------------|--------------------------|--------|----------|--------|-----------|------|
| SF <sub>6</sub>               | -44.0                    | -50.0  | 6.0      | -50.0  | 0.12      | 1.40 |
| SeF <sub>6</sub>              | -51.0                    | -55.1  | 4.1      | -55.1  | 0.07      | 1.43 |
| SiBr <sub>4</sub>             | -126.0                   | -218.1 | 92.1     | -218.1 | 0.42      | 1.06 |
| SiCl <sub>4</sub>             | -87.5                    | -118.1 | 30.6     | -118.1 | 0.26      | 1.26 |
| TeF <sub>6</sub>              | -66.0                    | -68.6  | 2.6      | -68.6  | 0.04      | 1.88 |
| H <sub>2</sub>                | -4.0                     | -8.0   | 4.0      | -8.0   | 0.50      | 0.00 |
| HCl                           | -22.6                    | -29.0  | 6.4      | -29.0  | 0.22      | 0.96 |
| HF                            | -8.6                     | -8.1   | -0.5     | -8.1   | -0.06     | 1.78 |
| HI                            | -48.3                    | -80.0  | 31.7     | -80.0  | 0.40      | 0.46 |
| H <sub>2</sub> O              | -13.0                    | -12.6  | -0.4     | -12.6  | -0.03     | 1.24 |
| H <sub>2</sub> S              | -25.5                    | -40.0  | 14.5     | -40.0  | 0.36      | 0.38 |
| NH <sub>3</sub>               | -16.3                    | -22.0  | 5.7      | -22.0  | 0.26      | 0.84 |
| CH <sub>4</sub>               | -17.4                    | -50.0  | 32.6     | -50.0  | 0.65      | 0.35 |
| LiF                           | -8.7±0.2 <sup>[a]</sup>  | -8.7   | 0.0±0.2  | -8.7   | 0.00±0.01 | 3.00 |
| NaF                           | -11.0±0.2 <sup>[a]</sup> | -12.3  | 1.3±0.2  | -12.3  | 0.11±0.01 | 3.05 |
| KF                            | -20.0±0.2 <sup>[a]</sup> | -24.8  | 4.8±0.2  | -24.8  | 0.19±0.01 | 3.16 |
| AlF <sub>3</sub>              | -22.5±0.6 <sup>[a]</sup> | -26.8  | 4.3±0.6  | -26.8  | 0.16±0.02 | 2.37 |
| LiH                           | -4.6                     | -8.6   | 4.0      | -8.6   | 0.47      | 1.22 |
| B <sub>2</sub> H <sub>6</sub> | -21.0                    | -48.4  | 27.4     | -48.4  | 0.57      | 0.16 |
| SiH <sub>4</sub>              | -20.4                    | -34.1  | 13.7     | -34.1  | 0.40      | 0.30 |
| GeH <sub>4</sub>              | -29.7                    | -40.5  | 10.8     | -40.5  | 0.27      | 0.19 |
| NaH                           | -6.9±0.6 <sup>[a]</sup>  | -12.2  | 5.3±0.6  | -12.2  | 0.43±0.05 | 1.27 |
| AlH <sub>3</sub>              | -5.0±4.0 <sup>[a]</sup>  | -26.5  | 21.5±4.0 | -26.5  | 0.81±0.14 | 0.59 |
| AlD <sub>3</sub>              | -7.0±2.5 <sup>[a]</sup>  | -26.5  | 19.5±2.5 | -26.5  | 0.74±0.10 | 0.59 |
| LiAlD <sub>4</sub>            | -14.8±0.5 <sup>[a]</sup> | -35.1  | 20.3±0.5 | -34.5  | 0.59±0.02 | 0.59 |
| LiAlH <sub>4</sub>            | -15.1±0.5 <sup>[a]</sup> | -35.1  | 20.0±0.5 | -34.5  | 0.58±0.02 | 0.59 |
| NaAlH <sub>4</sub>            | -15.7±0.5 <sup>[a]</sup> | -38.7  | 23.0±0.5 | -34.5  | 0.67±0.02 | 0.59 |
| LiBH <sub>4</sub>             | -16.7±0.5 <sup>[a]</sup> | -32.8  | 16.1±0.5 | -32.2  | 0.50±0.02 | 0.16 |
| NaBH <sub>4</sub>             | -19.5±0.5 <sup>[a]</sup> | -36.4  | 16.9±0.5 | -32.2  | 0.52±0.02 | 0.16 |

---
